# Supplementary material
Source: Springer Nature journal article supplement (https://www.springermedizin.de/resource/supplementary/12888_2014_1669_MOESM2_ESM.pdf/9481148)

Patients  
with the  
diagnosis  
BD and  
comorbid  
BPF & BPD

Randomization

T0

TAU plus STEPPS

TAU

T1

T2

T3

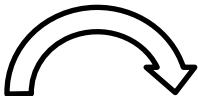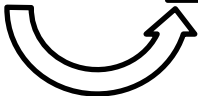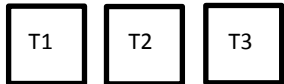

Supplement: MOESM2 [file 9481148]
